**Addendum**

## **Addendum: Multiple primary lung cancer displaying different EGFR and PTEN molecular profiles**

**Zhouyu Zhu<sup>1</sup>, Tao Yu<sup>1</sup> and Ying Chai<sup>1</sup>**

<sup>1</sup>Department of Thoracic Surgery, The Second Affiliated Hospital, College of Medicine, Zhejiang University, Hangzhou, China

**Published:** November 17, 2022

**Copyright:** © 2022 Zhu et al. This is an open access article distributed under the terms of the [Creative Commons Attribution License](#) (CC BY 3.0), which permits unrestricted use, distribution, and reproduction in any medium, provided the original author and source are credited.

**This article has an addendum:** Patient consent was obtained from the patient.

Original article: Oncotarget. 2016; 7:81969–81971. <https://doi.org/10.18632/oncotarget.13046>
